# Supplementary material for: A luminescent Ag8(DPPY)6(PhCC)6 cluster with a triangular superatomic Ag8 core
Source: Royal Society of Chemistry journal article supplement (doi:10.1039/d4nr00527a), 2024-01-01
Supplement: d4nr00527a1.pdf [file d4nr00527a1.pdf]

## Supplementary information for

### Luminescent $\text{Ag}_8(\text{DPPY})_6(\text{PhC}\equiv\text{C})_6\text{Cl}_6$ with a Triangular Superatomic $\text{Ag}_8$ Core

Blessing D. Peter,<sup>a,d#</sup> Wei Pei,<sup>b#</sup> Gaya N. Andrew,<sup>a#</sup> Si Zhou<sup>c\*</sup>, and Zhixun Luo<sup>a,d\*</sup>

<sup>a</sup> Beijing National Laboratory for Molecular Sciences (BNLMS), State Key Laboratory for Structural Chemistry of Unstable and Stable Species, Institute of Chemistry, Chinese Academy of Sciences, Beijing 100190, China.

<sup>b</sup> School of Chemistry, University of Chinese Academy of Sciences, Beijing 100049, China.

<sup>c</sup> Guangdong Basic Research Centre of Excellence for Structure and Fundamental Interactions of Matter, Guangdong Provincial Key Laboratory of Quantum Engineering and Quantum Materials, School of Physics, South China Normal University, Guangzhou 510006, P. R. China

# These authors contributed equally and share the first authorship.

\*Corresponding authors. Email: sizhou@dlut.edu.cn (SZ); zxluo@iccas.ac.cn (ZL)

**Table S1. Crystal data for the [Ag<sub>8</sub>(DPPY)<sub>6</sub>(PhC≡C)<sub>6</sub>] cluster.**

|                                   |                                                                                                  |
|-----------------------------------|--------------------------------------------------------------------------------------------------|
| Identification code               | mx8857a                                                                                          |
| Empirical formula                 | C <sub>152</sub> H <sub>116</sub> Ag <sub>8</sub> Cl <sub>6</sub> N <sub>6</sub> P <sub>6</sub>  |
| Formula weight                    | 3287.92                                                                                          |
| Temperature                       | 110.01(10)K                                                                                      |
| Crystal system                    | trigonal                                                                                         |
| Space group                       | R32                                                                                              |
| Unit cell dimensions              | a = 17.4780(3) Å      α = 90°<br>b = 17.4780(3) Å      β = 90°<br>c = 39.6944(7) Å      γ = 120° |
| Volume                            | 10501.3(4) Å <sup>3</sup>                                                                        |
| Z                                 | 3.00006                                                                                          |
| Density (calculated)              | 1.560 Mg/m <sup>3</sup>                                                                          |
| Absorption coefficient            | 1.330 mm <sup>-1</sup>                                                                           |
| F(000)                            | 4914.0                                                                                           |
| Crystal size                      | 0.28 × 0.25 × 0.23 mm <sup>3</sup>                                                               |
| Theta range for data collection   | 2.88 to 54.994°                                                                                  |
| Index ranges                      | -39 ≤ h ≤ 39, -39 ≤ k ≤ 39, -48 ≤ l ≤ 50                                                         |
| Reflections collected             | 33066                                                                                            |
| Independent reflections           | 5395 [R(int) = 0.0182]                                                                           |
| Completeness to theta = 27.424°   | 99.09%                                                                                           |
| Absorption correction             | Semi-empirical From equivalents                                                                  |
| Max. and min. transmission        | 1.0000 and 0.90394                                                                               |
| Refinement method                 | Full-matrix least-squares on F <sup>2</sup>                                                      |
| Data/restraints/parameters        | 5395/0/269                                                                                       |
| Goodness-of-fit on F <sup>2</sup> | 1.089                                                                                            |
| Final R indices [I > 2σ(I)]       | R <sub>1</sub> = 0.0196, wR <sub>2</sub> = 0.0584                                                |
| R indices (all data)              | R <sub>1</sub> = 0.0198, wR <sub>2</sub> = 0.0587                                                |
| Extinction coefficient            | n/a                                                                                              |
| Largest diff. peak/hole           | 0.40/-1.54 e. Å <sup>-3</sup>                                                                    |

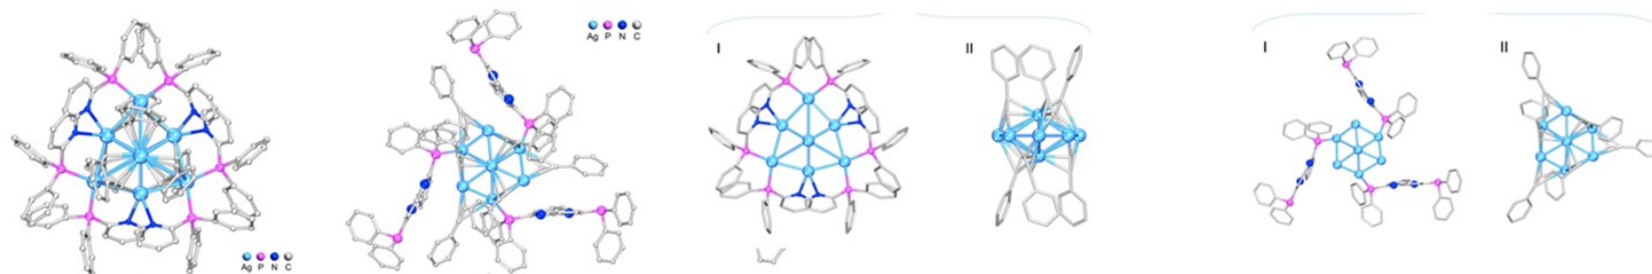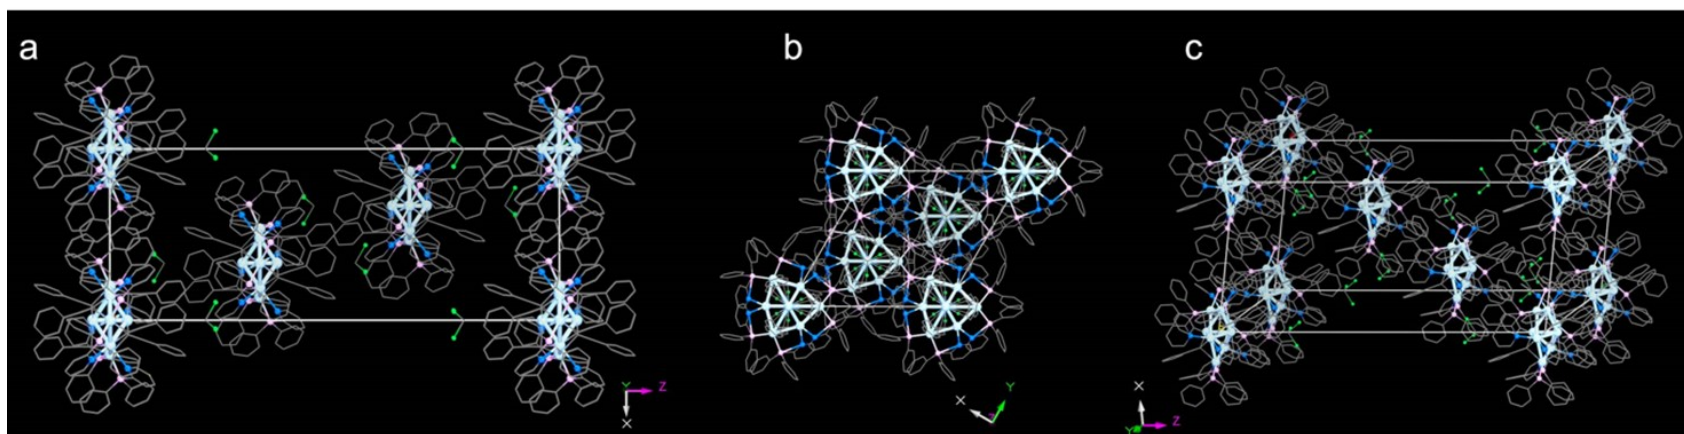

**Fig. S1** The single-crystal structure, coordination behavior, and the packing modes of the  $\text{Ag}_8(\text{DPPY})_6(\text{PhC}\equiv\text{C})_6$  cluster.

In addition to the improved structural stability observed due to the nature of ligand coordination to Ag atoms in the cluster, a thermal stability test was performed with thermogravimetric analysis (TGA) to determine the thermal strength of the cluster through thermal decomposition and weight loss in N<sub>2</sub> atmosphere shown in (Fig. S2). The cluster, first of all, undergoes step-wise decomposition showing a two-step thermal decomposition with a minor weight loss of 1.72% in the first step and a significant weight loss of 70.56% in the second step. The total weight loss is 72.28%. The major decomposition in the second phase begins at about 200°C, indicating thermal stability around 200°C.

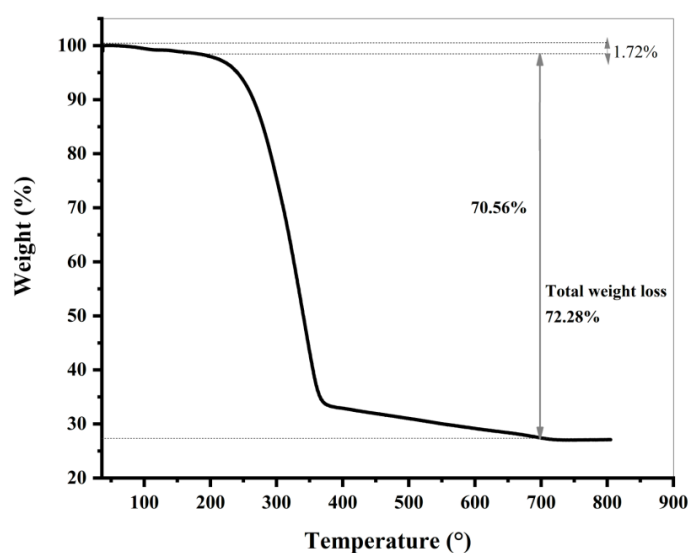

**Fig. S2** Thermogravimetric analysis of Ag<sub>8</sub>(DPPY)<sub>6</sub>(PhC≡C)<sub>6</sub> cluster in N<sub>2</sub> atmosphere.

To determine the oxidation state of Ag atoms, we conducted an XPS experiment in this regard using the binding energies and chemical shifts in XPS spectra (Fig. S3). We determined the Ag and P oxidation state in the surface region. The XPS spectrum of Ag 3d shows two peaks at binding energy values of 367.66 and 373.67 eV corresponding to Ag 3d<sub>5/2</sub> and Ag 3d<sub>3/2</sub> (Fig. S3b), suggesting the Ag valence state as Ag (I). Moreover, the binding energy of P, 2p<sub>3/2</sub> shows the peak at 131.07 eV is a characteristic of metal phosphate indicative of chemisorbed P species (Fig. S3c); the C 1s peak was located at 285.7 eV, corresponding to the natural character of the ligand chain (Fig. S3a).

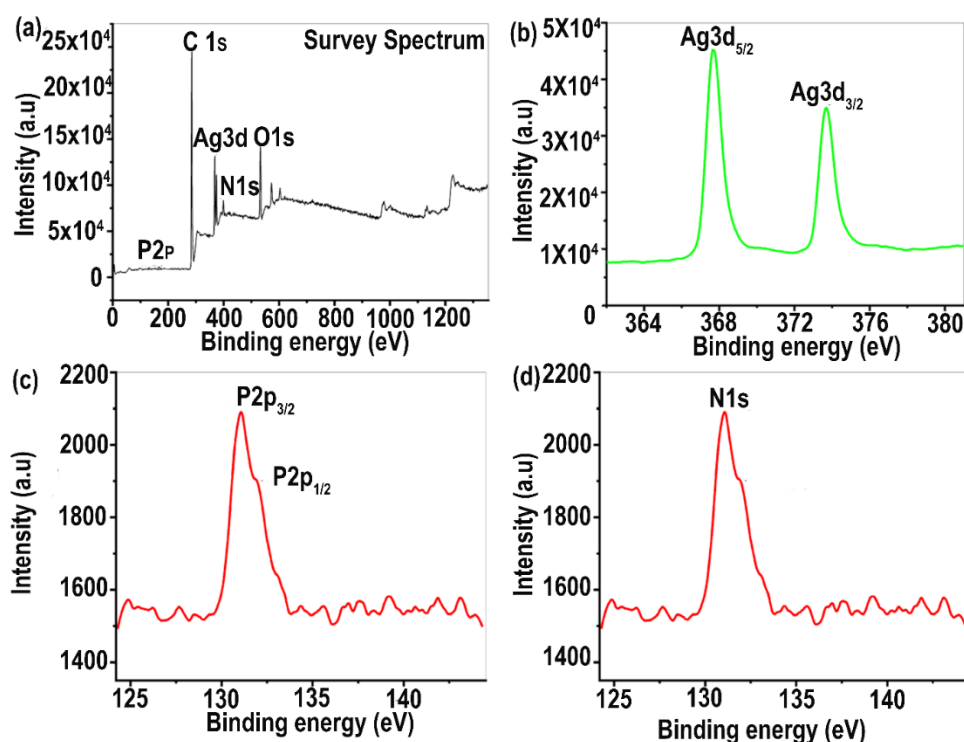

**Fig. S3** The XPS survey spectrum (a), and the XPS patterns of Ag 3d (b) and P 2p(c) and N 1s (d) of the [Ag<sub>8</sub>(DPPY)<sub>6</sub>(PhC≡C)<sub>6</sub>] cluster.
